# Supplementary material
Source: Springer Nature journal article supplement (https://www.springermedizin.de/resource/supplementary/12891_2013_1972_MOESM2_ESM.pdf/9508920)

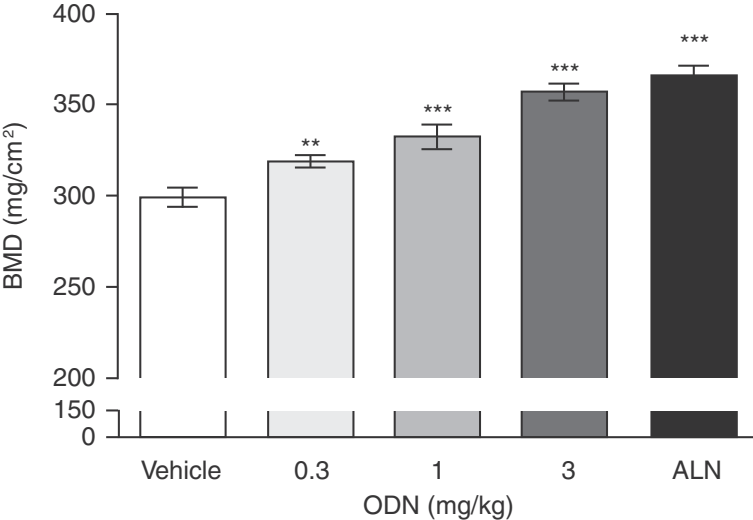

Supplement: MOESM2 [file 9508920]
